# Supplementary material for: Transcriptome analysis on the exoskeleton formation in early developmetal stages and reconstruction scenario in growth-moulting in Litopenaeus vannamei
Source: PubMed Central journal article supplement (PMC5430884; doi:10.1038/s41598-017-01220-6), 2017-04-24
Supplement: 41598_2017_1220_MOESM1_ESM.pdf [file 41598_2017_1220_MOESM1_ESM.pdf]

1 **Transcriptome analysis on the exoskeleton formation in early developmental**  
2 **stages and reconstruction scenario in growth-moulting in *Litopenaeus vannamei***

3 Yi Gao<sup>1</sup>, Jiankai Wei<sup>3</sup>, Jianbo Yuan<sup>1</sup>, Xiaojun Zhang<sup>1, 2\*</sup>, Fuhua Li<sup>1, 2</sup> and Jianhai  
4 Xiang<sup>1, 2\*</sup>

5

6 <sup>1</sup> Key Laboratory of Experimental Marine Biology, Institute of Oceanology, Chinese  
7 Academy of Sciences, Qingdao 266071, China.

8 <sup>2</sup> Laboratory for Marine Biology and Biotechnology, Qingdao National Laboratory for  
9 Marine Science and Technology, Qingdao 266071, China.

10 <sup>3</sup> Ocean University of China, Qingdao 266071, China.

11

12 \*Address correspondence to Jianhai Xiang email: [jhxiang@qdio.ac.cn](mailto:jhxiang@qdio.ac.cn); Xiaojun Zhang  
13 email: [xjzhang@qdio.ac.cn](mailto:xjzhang@qdio.ac.cn)

14

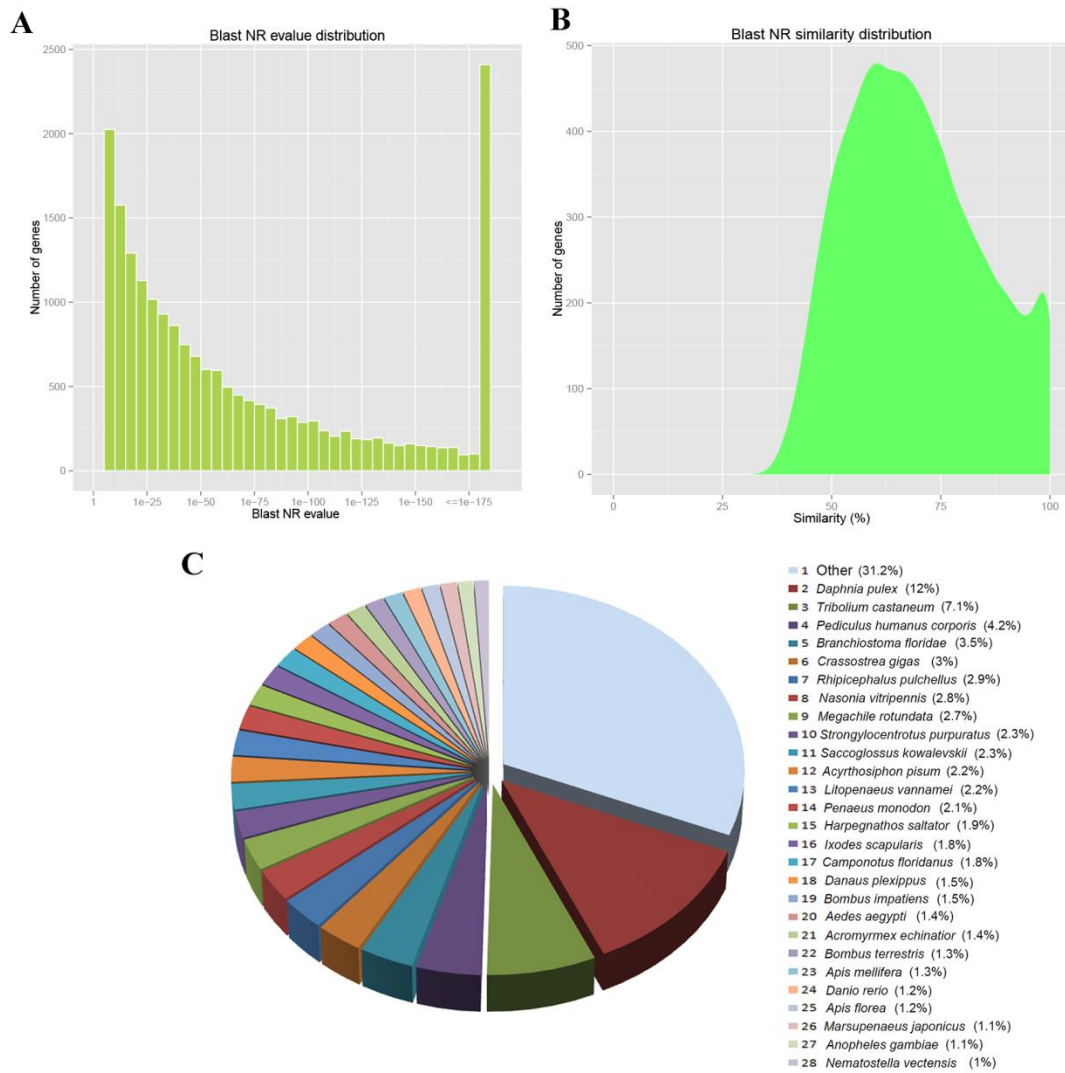

15

16 **Fig. S1** Summary of the homology search for all unigenes against the NR database. (a) E-value

17 distribution of the best blast hits; (b) Similarity distribution of the best blast hits; (c) Species

18 distribution of the best blast hits.

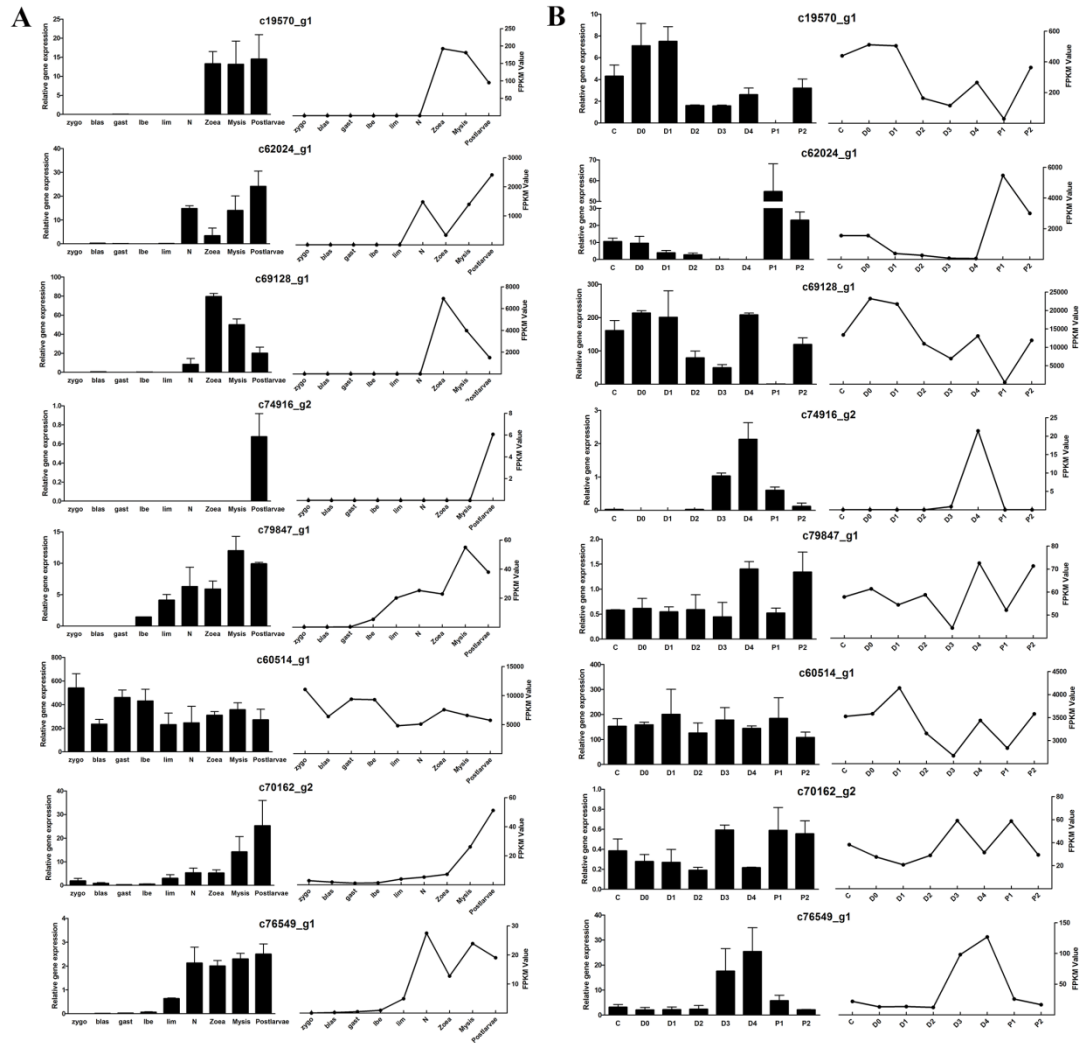

19

20 **Fig. S2.** Real-time quantitative PCR (qRT-PCR) validation. Eight differentially expressed genes  
 21 were selected for validation in nine early development stages (A) and eight moulting stages (B).  
 22 Expression results of qRT-PCR are shown on the left and expression profiles of RNA-sequencing  
 23 on the right. The data are expressed as the mean +SD after normalization.
